# Supplementary material for: Health Impacts of Ambient Biomass Smoke in Tasmania, Australia
Source: MDPI journal article supplement (doi:10.3390/ijerph17093264), 2020-05-07
Supplement: s1 [file s1]

# Supplementary Material for

## Health impacts of ambient biomass smoke in Tasmania, Australia

### Table of Contents

- **Figure S1.** Location of Base Line Air Network of EPA Tasmania (BLANkET ) Air Quality Monitoring Stations (a) and Bureau of Meteorology (BOM) weather stations (b)
- **Figure S2.** Fine particulate matter (PM<sub>2.5</sub>) concentration trends by time of the day and season (Summer, Transition, Winter) – base on data obtained from the Tasmania BLANkET air quality monitoring network [1]
- **Figure S3.** Tasmania Fire History (2010 – 2018). Total surface burnt (hectares and %) by fire type [2]
- **Table S1.** Population and health data – yearly averages
- **Table S2.** Health economic indicators
- **Table S3.** Estimated wood heater count per Statistical Area Level 3 (SA3)
- **Figure S4.** Average PM<sub>2.5</sub> concentration by Statistical Area Level 2 (SA2) and month over the study period of January 2010 and December 2019
- **Figure S5.** Average heating degree days (HDD) by SA2 level and month over the study period of January 2010 and December 2019
- **Table S4.** Summary statistics for Daily PM<sub>2.5</sub> (µg/m<sup>3</sup>) per monitoring station – 01/01/2010 to 31/12/2019
- **Figure S6.** Monthly estimated landscape fire smoke (LFS) PM<sub>2.5</sub> by month
- **Figure S7.** Monthly estimated wood heater smoke (WHS) PM<sub>2.5</sub> by month
- **Table S5.** Average number of days per year (total and %) and 24h PM<sub>2.5</sub> summary statistics by day type and year
- **Figure S8.** Boxplot of estimated daily health costs by event type
- **Table S6.** Summary indicators for sensitivity analysis – all months
- **Table S7.** Summary indicators for sensitivity analysis – excluding months with predicted biomass smoke source

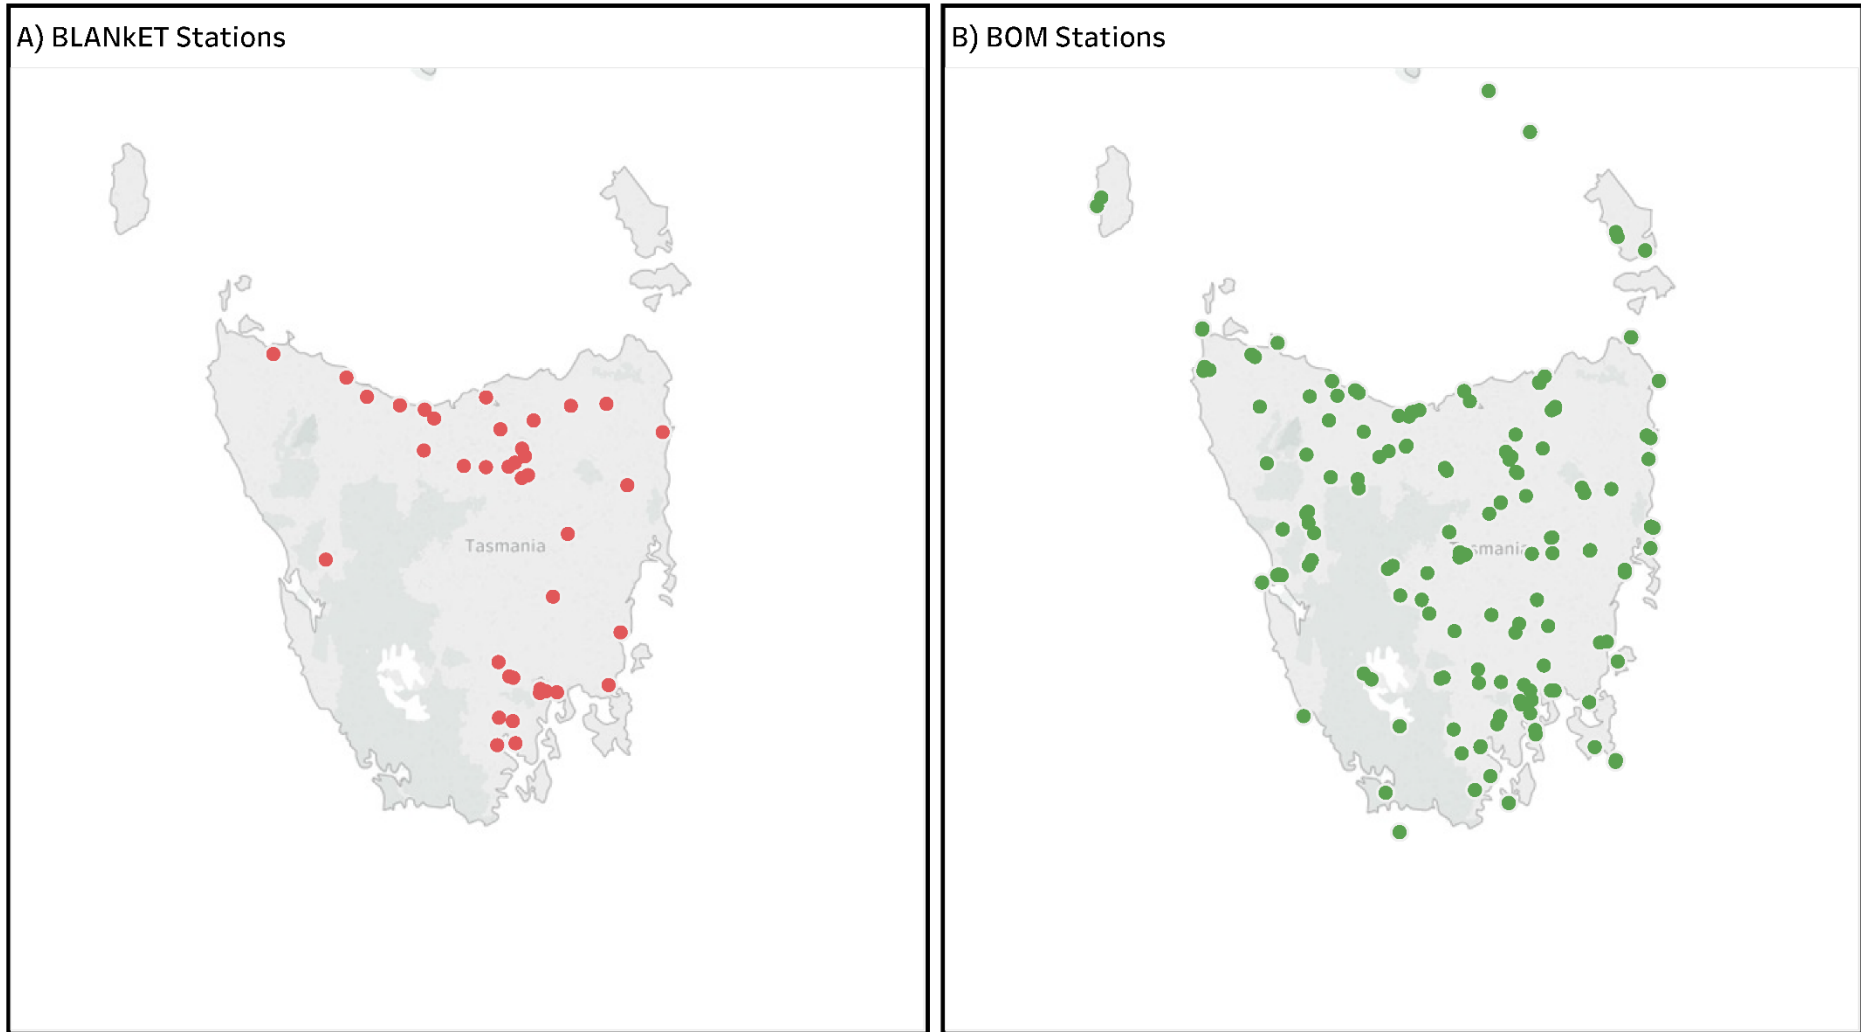

**Figure S1.** Location of Base Line Air Network of EPA Tasmania (BLANKET ) Air Quality Monitoring Stations (a) and Bureau of Meteorology (BOM) weather stations (b)

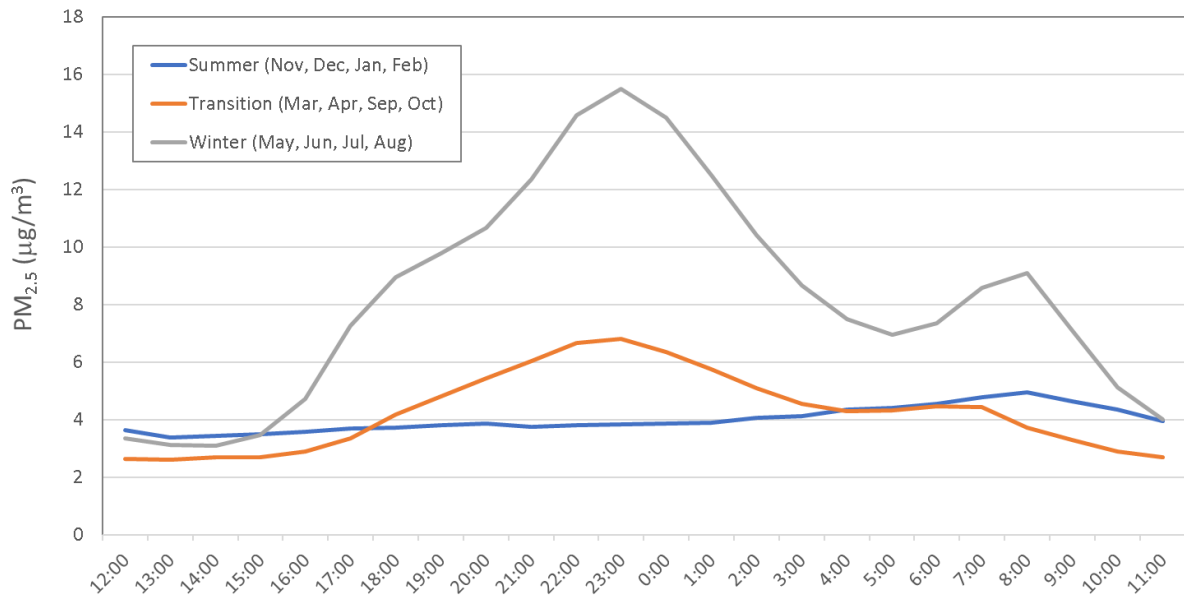

**Figure S2.** Fine particulate matter (PM<sub>2.5</sub>) concentration trends by time of the day and season (Summer, Transition, Winter) – base on data obtained from the Tasmania BLANKET air quality monitoring network [1]. Air pollution generated by wood heaters follows a common pattern throughout the cooler months, with characteristic seasonal and diurnal patterns with a large peak overnight, and smaller peak in the early morning [3–6]

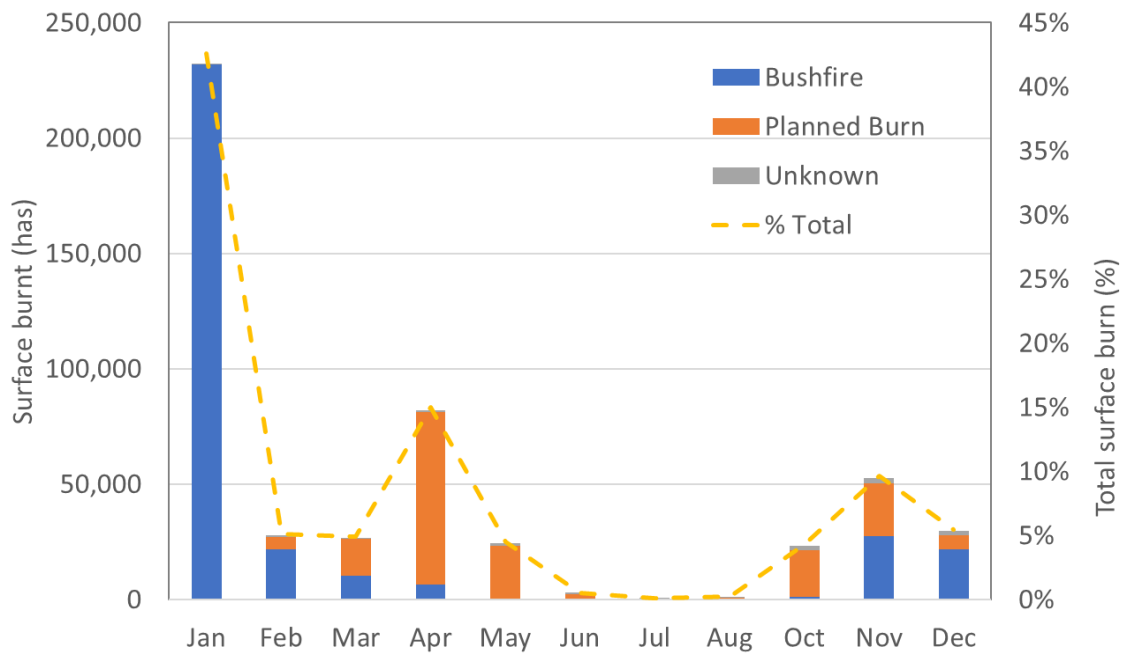

**Figure S3.** Tasmania Fire History (2010 – 2018). Total surface burnt (hectares and %) by fire type [2] Landscape fire activity exhibits strong seasonal patterns. Historical data demonstrate that between 2010 and 2018 bushfires dominate during January (42.5% of total hectares burnt) and planned burns during April (13.7% of total hectares burnt) (**Error! Reference source not found.**). For June, July and August there are almost no records of fires with less than 1% of total hectares being burnt during winter.

**Table S1.** Population and health data – yearly averages

|                                                                | Females | Males   | All   |
|----------------------------------------------------------------|---------|---------|-------|
| Population* (persons)                                          |         |         |       |
| 0-4 years                                                      | 15,044  | 16,013  |       |
| 5-14 years                                                     | 30,739  | 32,812  |       |
| 15-24 years                                                    | 31,390  | 33,646  |       |
| 25-34 years                                                    | 30,161  | 29,735  |       |
| 35-44 years                                                    | 32,512  | 31,040  |       |
| 45-54 years                                                    | 36,564  | 35,142  |       |
| 55-64 years                                                    | 35,053  | 34,524  |       |
| 65+ years                                                      | 47,620  | 42,214  |       |
| All                                                            | 259,083 | 255,127 |       |
| Deaths** (cases/year)                                          |         |         |       |
| 0-4 years                                                      | 14      | 21      |       |
| 5-14 years                                                     | 15      | 22      |       |
| 15-24 years                                                    | 19      | 28      |       |
| 25-34 years                                                    | 29      | 53      |       |
| 35-44 years                                                    | 80      | 114     |       |
| 45-54 years                                                    | 7       | 8       |       |
| 55-64 years                                                    | 165     | 253     |       |
| 65+ years                                                      | 1,841   | 1,731   |       |
| All                                                            | 2,169   | 2,230   |       |
| Hospitalizations – Respiratory*** (cases/100,000 persons-year) |         |         |       |
| 0-4 years                                                      | 3,271.1 | 5,571.8 |       |
| 5-14 years                                                     | 1,041.8 | 1,031.8 |       |
| 15-24 years                                                    | 1,308.5 | 923.4   |       |
| 25-34 years                                                    | 1,083.9 | 650.3   |       |
| 35-44 years                                                    | 965.8   | 648.0   |       |
| 45-54 years                                                    | 1,138.2 | 1,158.9 |       |
| 55-64 years                                                    | 1,562.8 | 1,302.2 |       |
| 65+ years                                                      | 3,329.8 | 4,675.7 |       |
| All                                                            | 1,451.3 | 1,540.7 |       |
| Hospitalizations – Circulatory*** (cases/100,000 persons-year) |         |         |       |
| 0-4 years                                                      | 2.3     | 76.5    |       |
| 5-14 years                                                     | 71.7    | 341.8   |       |
| 15-24 years                                                    | 67.3    | 445.7   |       |
| 25-34 years                                                    | 523.0   | 543.0   |       |
| 35-44 years                                                    | 799.5   | 748.1   |       |
| 45-54 years                                                    | 929.7   | 2,154.4 |       |
| 55-64 years                                                    | 2,078.1 | 4,294.8 |       |
| 65+ years                                                      | 6,668.5 | 9,967.9 |       |
| All                                                            | 1,480.6 | 2,177.6 |       |
| Emergency Department (ED) visits – Asthma (cases/year)         |         |         |       |
| 2014-15                                                        |         |         | 1,372 |
| 2015-16                                                        |         |         | 1,447 |
| 2016-17                                                        |         |         | 1,451 |

\*average for 2010 – 2017, \*\* average for 2010 – 2016, \*\*\*average for July 2013 to June 2015

**Table S2. Health economic indicators**

| <b>Source</b> | <b>Indicator</b>                                  | <b>Description</b>                    |
|---------------|---------------------------------------------------|---------------------------------------|
| WHS           | Total Cost (\$AUD)                                | Total WHS costs                       |
|               | Cost per day (\$AUD/WHS-day)                      | Average daily WHS cost                |
|               | Cost per year (\$AUD/year)                        | Average yearly WHS cost               |
|               | Cost per woodstove-year<br>(\$AUD/woodstove-year) | Average yearly WHS cost per woodstove |
| LFS           | Total Cost (\$AUD)                                | Total LFS cost                        |
|               | Cost per day (\$AUD/LFS-day)                      | Average daily LFS cost                |
|               | Cost per year (\$AUD/year)                        | Average yearly LFS cost               |

Note. WHS = wood heater smoke. LFS = landscape fire smoke. AUD = Australian dollars.

**Table S3.** Estimated wood heater count per Statistical Area Level 3 (SA3). ESTIMATED BASED ON [6] and [7]

| <b>SA3</b>                  | <b># wood heaters</b> |
|-----------------------------|-----------------------|
| Brighton                    | 1,877                 |
| Hobart - North East         | 4,432                 |
| Hobart - North West         | 4,399                 |
| Hobart - South and West     | 3,269                 |
| Hobart Inner                | 3,478                 |
| Sorell - Dodges Ferry       | 2,723                 |
| Launceston                  | 7,527                 |
| Meander Valley - West Tamar | 5,531                 |
| North East                  | 8,796                 |
| Central Highlands (Tas.)    | 4,910                 |
| Huon - Bruny Island         | 5,253                 |
| South East Coast            | 2,241                 |
| Burnie - Ulverstone         | 5,023                 |
| Devonport                   | 6,613                 |
| West Coast                  | 3,245                 |
| <b>TOTAL</b>                | <b>69,317</b>         |

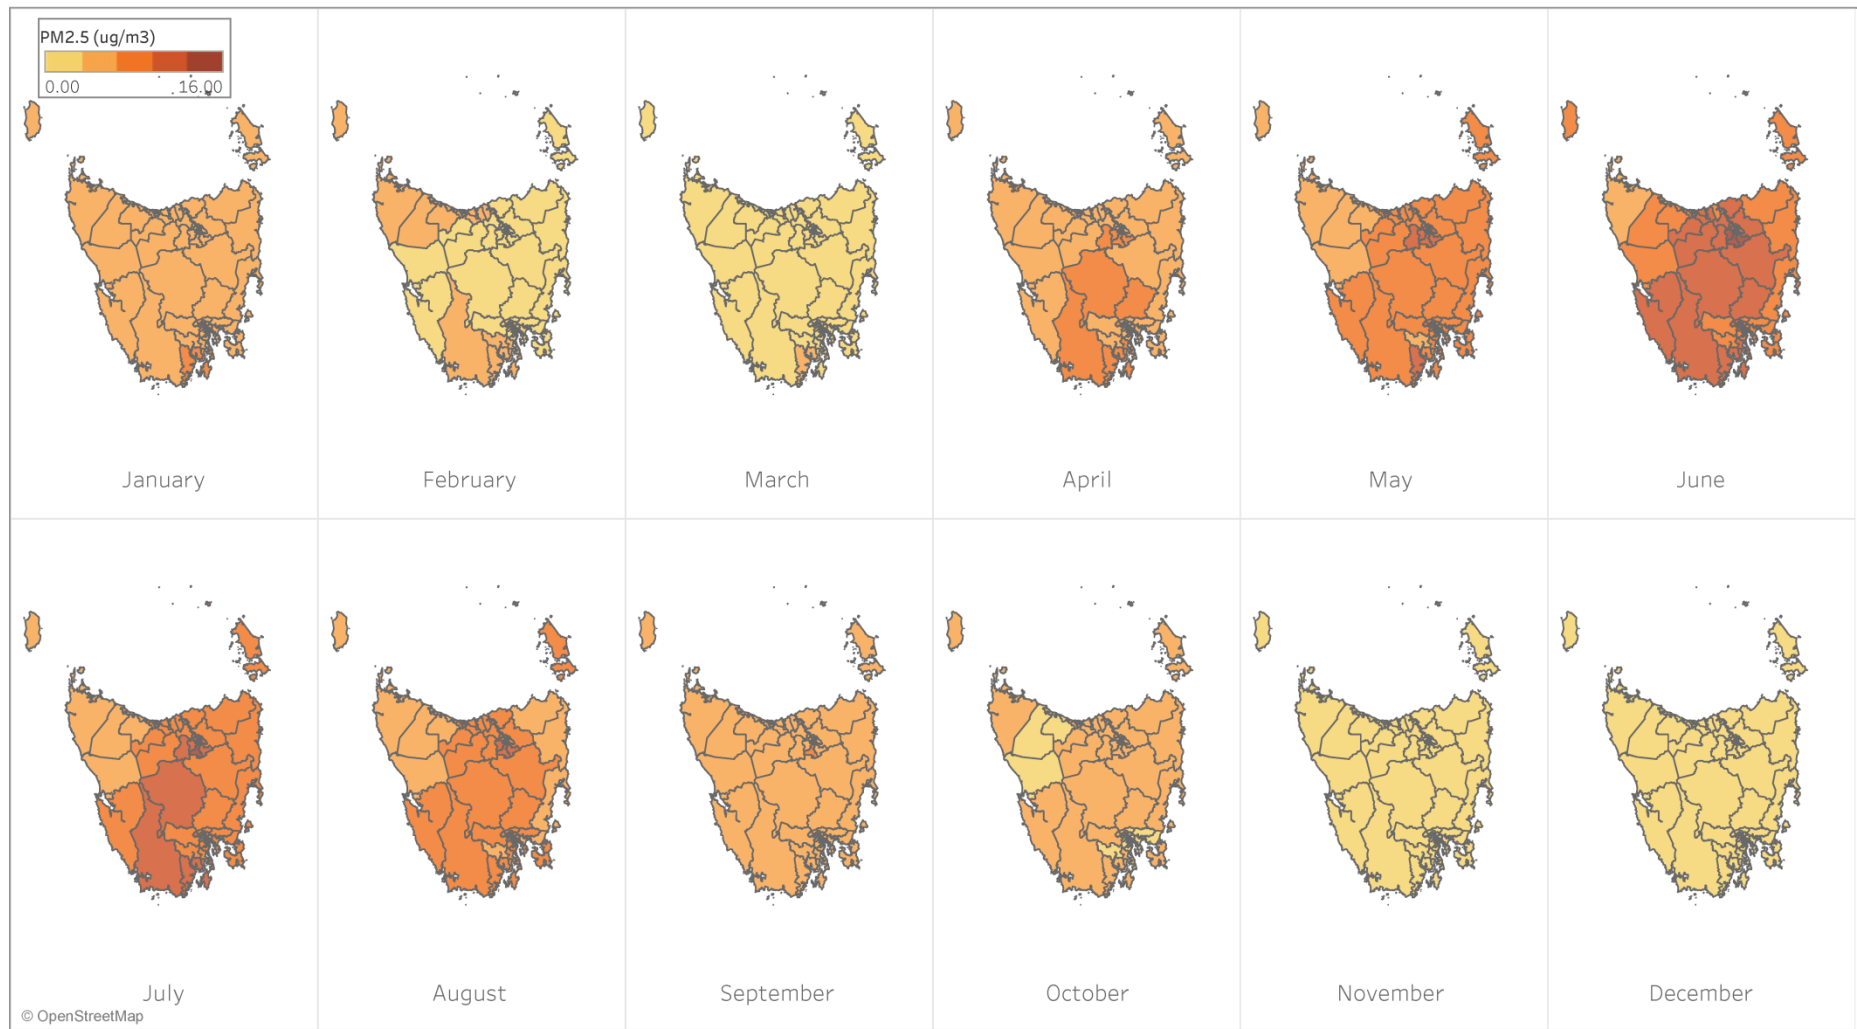

**Figure S4.** Average PM<sub>2.5</sub> concentration by Statistical Area Level 2 (SA2) and month over the study period of January 2010 and December 2019



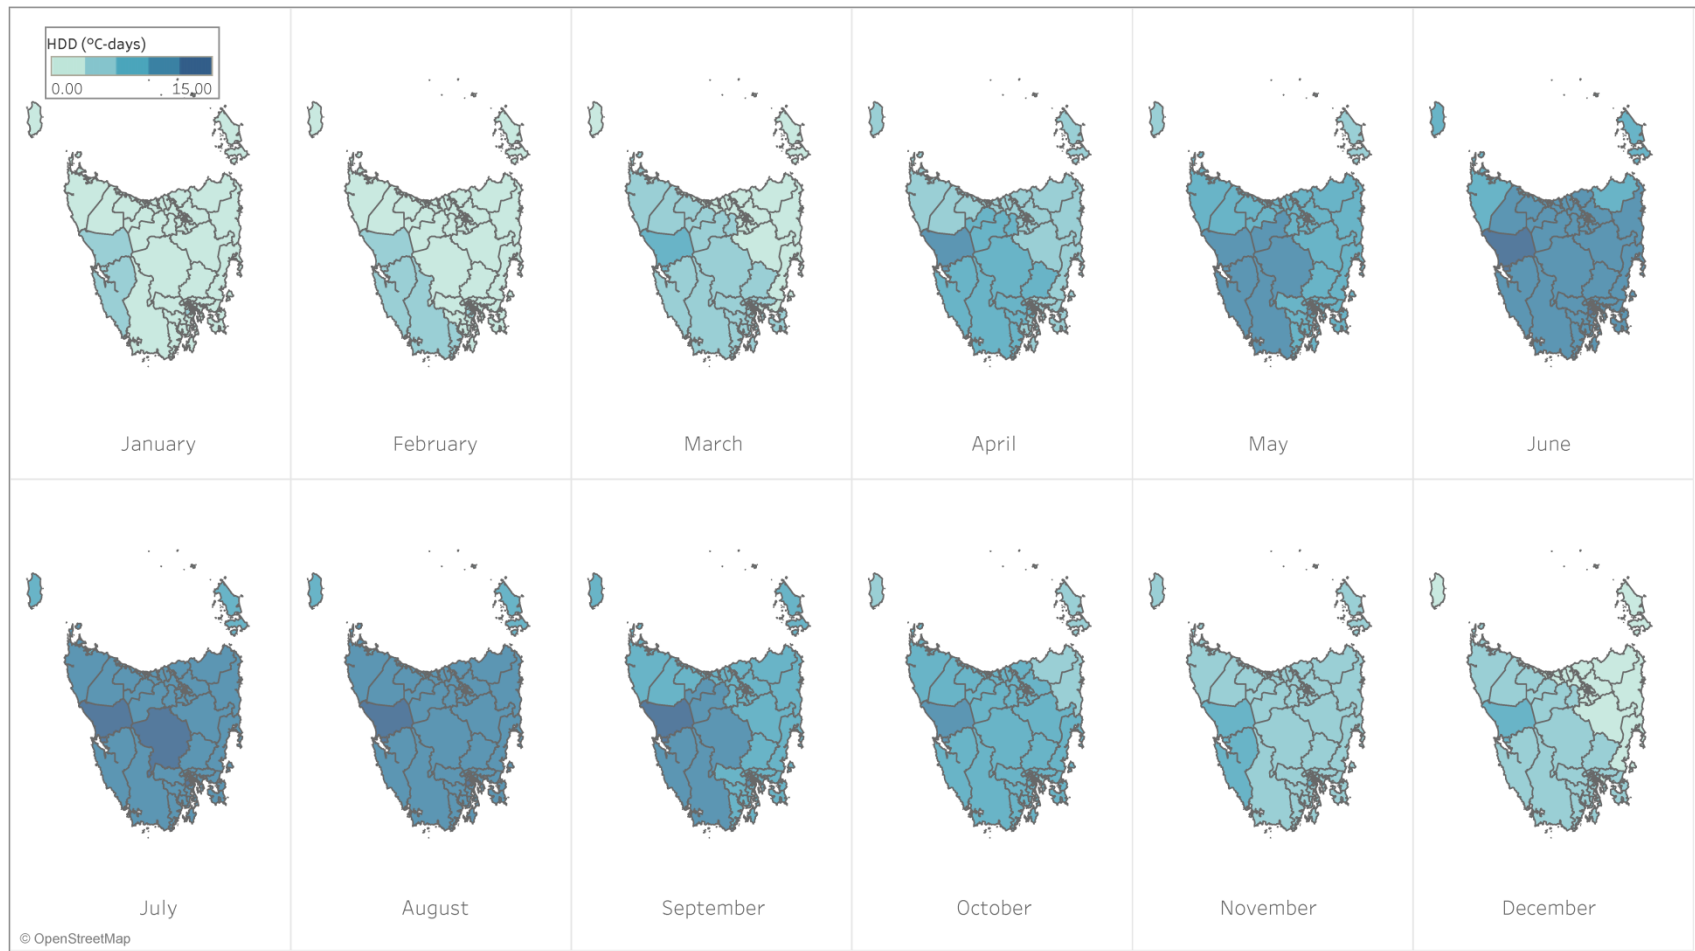

**Figure S5.** Average heating degree days (HDD) by SA2 level and month over the study period of January 2010 and December 2019

**Table S4.** Summary statistics for Daily PM<sub>2.5</sub> (µg/m<sup>3</sup>) per monitoring station – 01/01/2010 to 31/12/2019

| Station_name              | COUNT | MIN | AVG  | MAX   |
|---------------------------|-------|-----|------|-------|
| Bream Creek               | 1,906 | 0.3 | 2.9  | 42.0  |
| Bryn Estyn                | 1090  | 0.4 | 3.4  | 40.5  |
| Carrick                   | 1036  | 0.4 | 3.4  | 29.0  |
| Clearys Gates             | 908   | 0.4 | 3.3  | 31.9  |
| Campbell Town             | 2,574 | 0.3 | 5.4  | 60.8  |
| Cygnets                   | 1214  | 0.2 | 4.9  | 350.6 |
| Derby                     | 3,518 | 0.2 | 3.6  | 52.7  |
| Deloraine                 | 1,738 | 0.3 | 7.4  | 48.6  |
| Devonport                 | 2,152 | 0.4 | 5.3  | 119.6 |
| Emu River                 | 3,383 | 0.2 | 2.5  | 206.4 |
| Exeter                    | 3,472 | 0.3 | 3.5  | 290.0 |
| Fingal                    | 3,472 | 0.2 | 3.1  | 67.0  |
| George Town               | 2,964 | 0.4 | 4.3  | 145.7 |
| Glenorchy                 | 1236  | 0.3 | 4.4  | 55.8  |
| Gretna                    | 3,387 | 0.3 | 3.2  | 86.2  |
| Geeveston                 | 3,550 | 0.5 | 10.3 | 506.3 |
| Hadspen                   | 2,439 | 0.4 | 9.7  | 137.5 |
| Hobart                    | 3,486 | 0.0 | 4.6  | 58.5  |
| Huonville                 | 3,467 | 0.0 | 6.4  | 148.3 |
| Judbury                   | 3,406 | 0.1 | 2.6  | 194.2 |
| Lilydale                  | 3,510 | 0.3 | 4.7  | 94.3  |
| Longford                  | 2,404 | 0.5 | 10.9 | 183.6 |
| Latrobe                   | 293   | 1.0 | 9.2  | 67.3  |
| Mornington                | 2,191 | 0.1 | 3.3  | 46.9  |
| New Norfolk               | 2,596 | 0.3 | 9.9  | 67.6  |
| Oatlands                  | 1231  | 0.5 | 6.0  | 31.1  |
| Perth                     | 2,292 | 0.3 | 9.2  | 140.4 |
| Poatina                   | 1087  | 0.2 | 2.8  | 74.2  |
| Queenstown                | 623   | 0.7 | 7.0  | 43.5  |
| Scottsdale                | 3,541 | 0.2 | 4.3  | 79.3  |
| Sheffield                 | 3,431 | 0.1 | 4.0  | 155.5 |
| St Helens                 | 3,516 | 0.2 | 2.6  | 141.0 |
| South Launceston          | 3,368 | 0.4 | 6.2  | 153.1 |
| Smithton                  | 3,073 | 0.5 | 4.6  | 316.0 |
| Ti Tree Bend (Launceston) | 1004  | 0.4 | 5.6  | 49.1  |
| Triabunna                 | 1033  | 0.5 | 6.7  | 129.8 |
| Westbury                  | 1051  | 0.6 | 8.1  | 42.8  |
| West Ulverstone           | 1045  | 0.4 | 3.6  | 33.0  |
| Wynyard                   | 1046  | 0.6 | 5.7  | 42.1  |

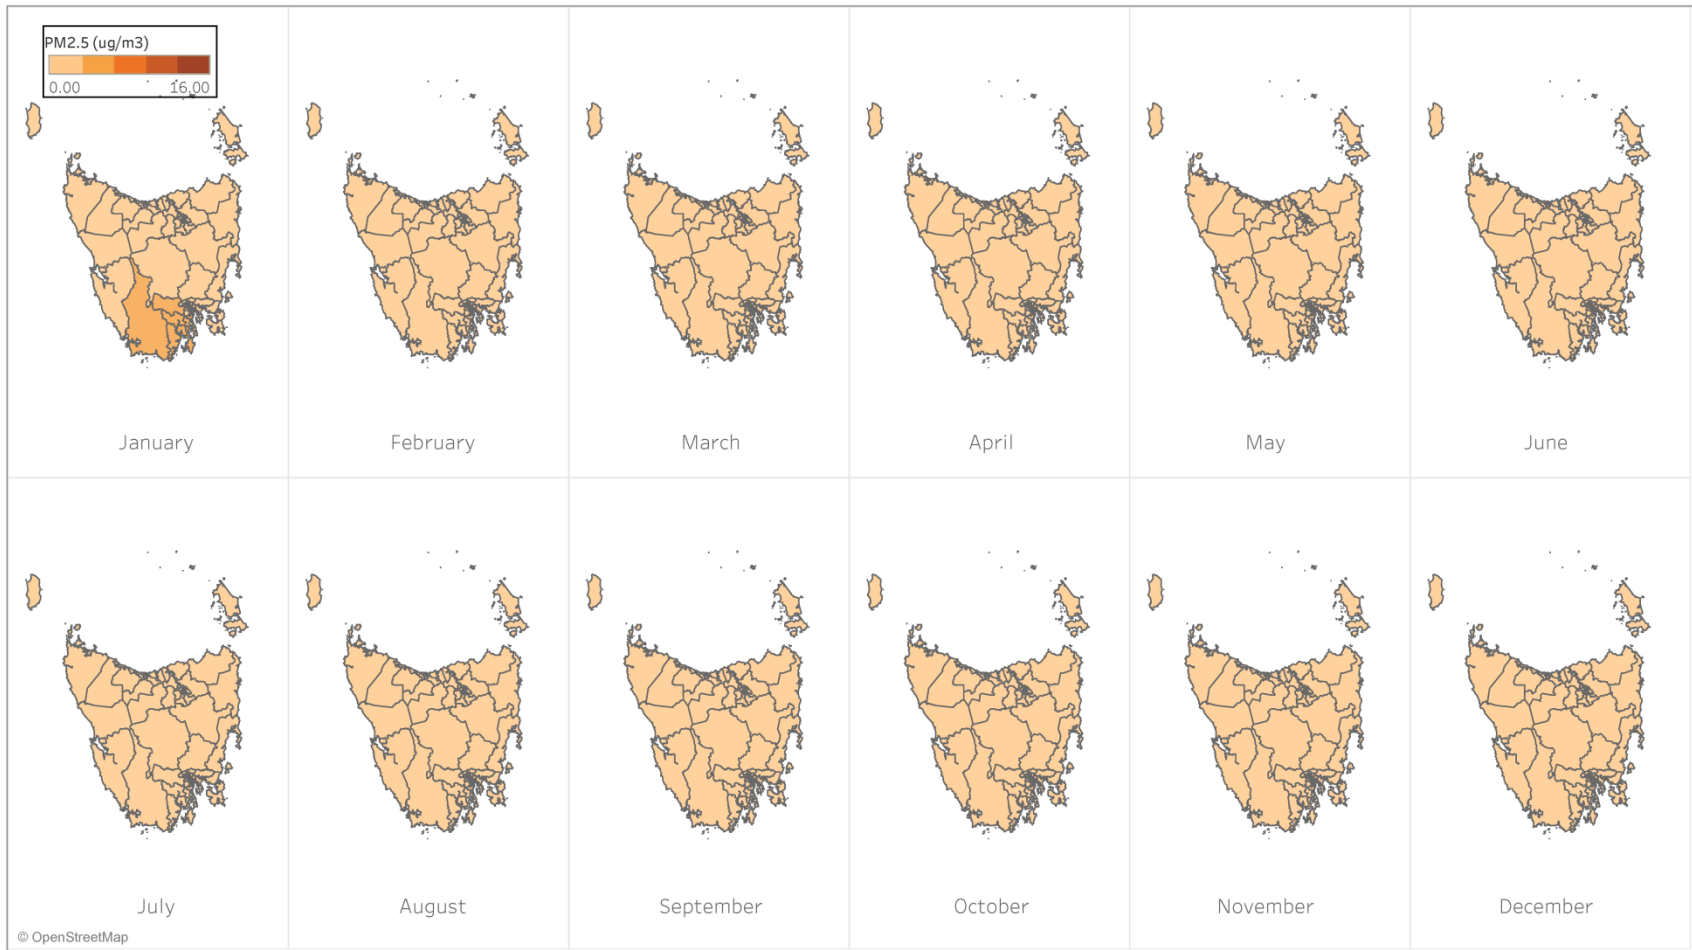

**Figure S6.** Monthly estimated landscape fire smoke (LFS) PM<sub>2.5</sub> fraction by month

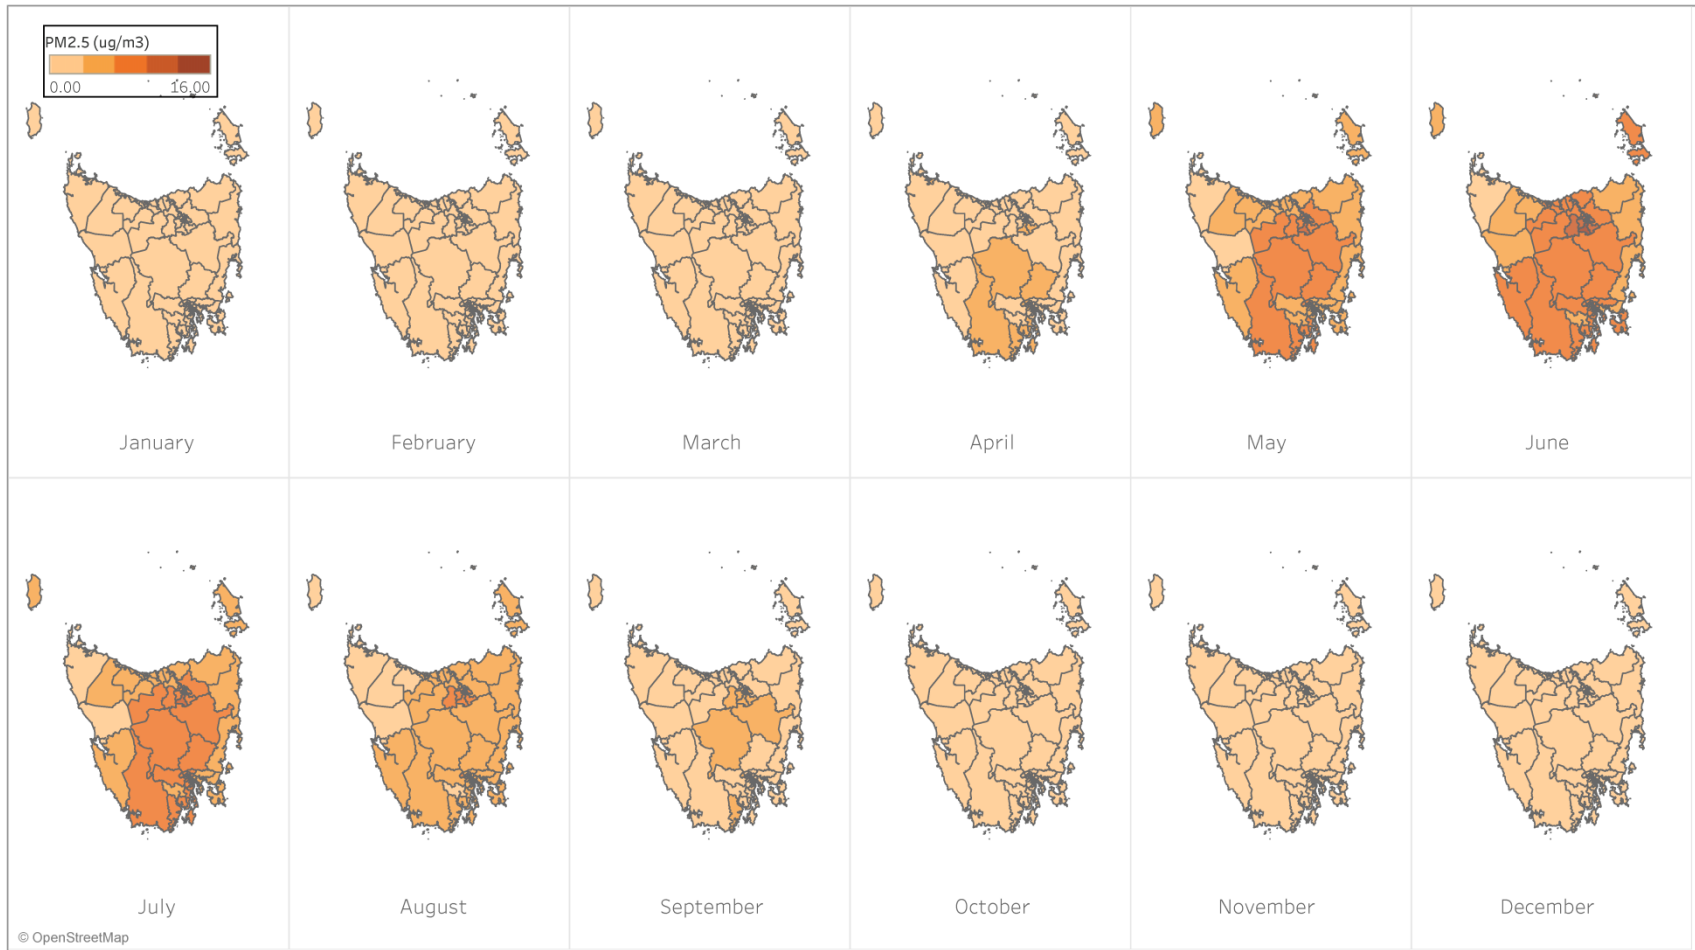

**Figure S7.** Monthly estimated wood heater smoke (WHS) PM<sub>2.5</sub> fraction by month

**Table S5.** Average number of days per year (total and %) and 24h PM<sub>2.5</sub> summary statistics by day type and year

| Day type   | Statistic                      | 2010  | 2011  | 2012  | 2013  | 2014  | 2015  | 2016  | 2017  | 2018  | 2019  |
|------------|--------------------------------|-------|-------|-------|-------|-------|-------|-------|-------|-------|-------|
| Unpolluted | Average days per year (# days) | 110.3 | 107.9 | 106.2 | 89.4  | 79.9  | 94.2  | 92.1  | 82.5  | 93.2  | 94.6  |
|            | Average days per year (%)      | 30.2% | 29.6% | 29.0% | 24.5% | 21.9% | 25.8% | 25.2% | 22.6% | 25.5% | 25.9% |
|            | Mean (mg/m3)                   | 1.6   | 1.5   | 1.4   | 1.4   | 1.6   | 1.4   | 1.5   | 1.2   | 1.3   | 1.3   |
|            | SD (mg/m3)                     | 0.4   | 0.3   | 0.4   | 0.4   | 0.4   | 0.4   | 0.4   | 0.5   | 0.5   | 0.5   |
|            | Max (mg/m3)                    | 3.1   | 2.2   | 2.4   | 2.3   | 2.7   | 2.4   | 2.3   | 2.4   | 2.2   | 2.8   |
| LFS        | Average days per year (# days) | 111.9 | 102.6 | 111.8 | 109.5 | 121.5 | 103.3 | 120.0 | 118.4 | 108.4 | 110.5 |
|            | Average days per year (%)      | 30.7% | 28.1% | 30.5% | 30.0% | 33.3% | 28.3% | 32.8% | 32.4% | 29.7% | 30.3% |
|            | Mean (mg/m3)                   | 4.1   | 3.1   | 3.5   | 4.2   | 4.1   | 3.6   | 6.3   | 3.6   | 3.1   | 6.3   |
|            | SD (mg/m3)                     | 3.2   | 1.3   | 1.5   | 5.5   | 2.5   | 1.7   | 12.9  | 3.2   | 1.4   | 11.9  |
|            | Max (mg/m3)                    | 52.0  | 14.7  | 20.9  | 142.7 | 33.5  | 32.1  | 312.8 | 38.5  | 39.5  | 237.8 |
| WHS        | Average days per year (# days) | 142.8 | 154.4 | 148.0 | 166.0 | 163.6 | 167.5 | 153.9 | 164.2 | 163.4 | 159.5 |
|            | Average days per year (%)      | 39.1% | 42.3% | 40.4% | 45.5% | 44.8% | 45.9% | 42.0% | 45.0% | 44.8% | 43.7% |
|            | Mean (mg/m3)                   | 7.7   | 6.0   | 6.5   | 8.7   | 9.4   | 8.2   | 7.1   | 8.4   | 7.8   | 6.8   |
|            | SD (mg/m3)                     | 6.5   | 3.7   | 4.0   | 5.9   | 5.8   | 6.0   | 5.3   | 5.3   | 5.5   | 4.6   |
|            | Max (mg/m3)                    | 168.4 | 33.1  | 40.7  | 46.0  | 47.5  | 54.1  | 109.1 | 51.5  | 81.5  | 48.3  |

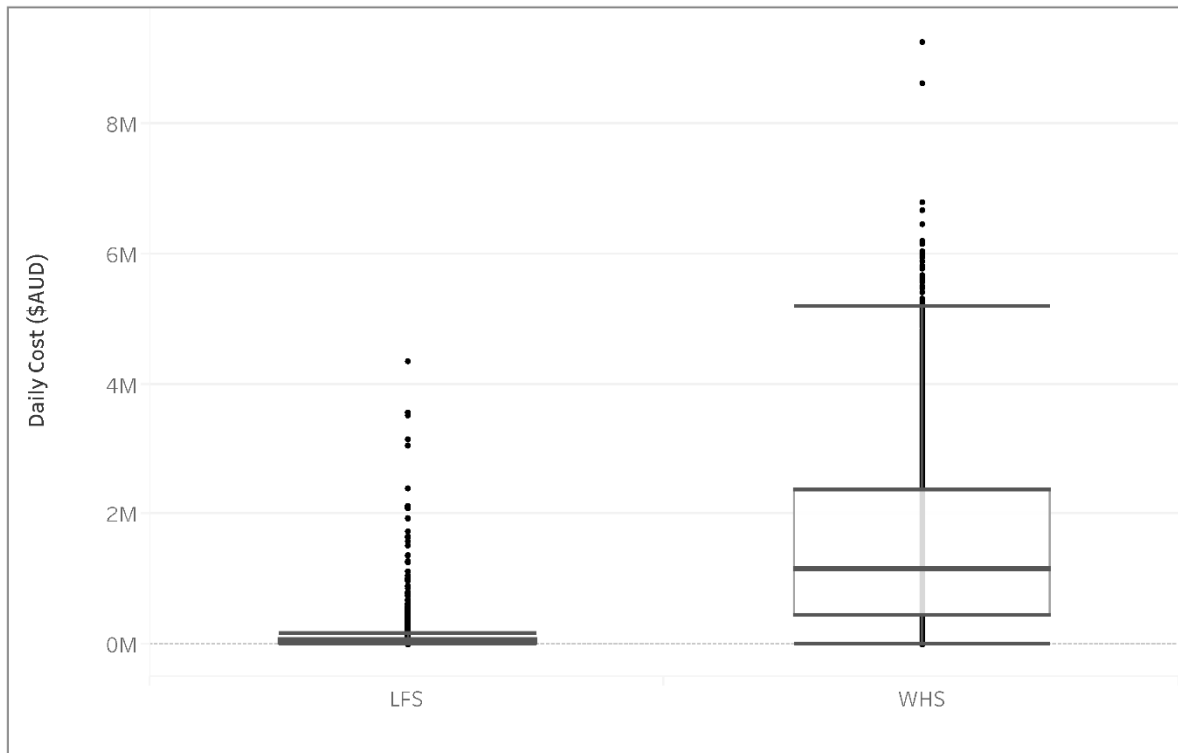

**Figure S8.** Boxplot of estimated daily health costs by event type

**Table S6.** Summary indicators for sensitivity analysis – all months

| Scenario | PM2.5 threshold for LFS summer day | Start of winter | End of winter | Costs - Woodstove | Costs per day - Woodstove | Costs per year - Woodstove | Costs per woodheater-year | Costs - LFS | Costs per day - LFS | Costs per year - LFS |
|----------|------------------------------------|-----------------|---------------|-------------------|---------------------------|----------------------------|---------------------------|-------------|---------------------|----------------------|
|          |                                    |                 |               | \$AUD             | \$AUD/wHS-day             | \$AUD/year                 | \$AUD/woodheater-year     | \$AUD       | \$AUD/LFS-day       | \$AUD/year           |
| 1        | P75                                | May             | July          | 3,189,476,033     | 1,712,930                 | 318,947,603                | 4,601                     | 193,640,431 | 89,898              | 19,364,043           |
| 2        | P75                                | May             | August        | 3,175,192,513     | 1,697,964                 | 317,519,251                | 4,581                     | 196,512,399 | 92,870              | 19,651,240           |
| 3        | P75                                | June            | July          | 2,813,680,667     | 1,656,080                 | 281,368,067                | 4,059                     | 270,285,179 | 109,250             | 27,028,518           |
| 4        | P75                                | June            | August        | 2,905,662,596     | 1,677,634                 | 290,566,260                | 4,192                     | 251,361,050 | 106,690             | 25,136,105           |
| 5        | P90                                | May             | July          | 3,033,500,220     | 1,629,162                 | 303,350,022                | 4,376                     | 169,461,316 | 78,673              | 16,946,132           |
| 6        | P90                                | May             | August        | 3,018,845,705     | 1,614,356                 | 301,884,570                | 4,355                     | 172,414,756 | 81,481              | 17,241,476           |
| 7        | P90                                | June            | July          | 2,680,121,757     | 1,577,470                 | 268,012,176                | 3,866                     | 241,519,076 | 97,623              | 24,151,908           |
| 8        | P90                                | June            | August        | 2,765,620,955     | 1,596,779                 | 276,562,096                | 3,990                     | 223,926,308 | 95,045              | 22,392,631           |
| 9        | P95                                | May             | July          | 2,948,444,800     | 1,583,483                 | 294,844,480                | 4,254                     | 157,763,123 | 73,242              | 15,776,312           |
| 10 (*)   | P95                                | May             | August        | 2,933,796,608     | 1,568,875                 | 293,379,661                | 4,232                     | 160,717,637 | 75,954              | 16,071,764           |
| 11       | P95                                | June            | July          | 2,607,636,689     | 1,534,807                 | 260,763,669                | 3,762                     | 227,242,753 | 91,852              | 22,724,275           |
| 12       | P95                                | June            | August        | 2,689,558,900     | 1,552,863                 | 268,955,890                | 3,880                     | 210,385,117 | 89,298              | 21,038,512           |
| 13       | P99                                | May             | July          | 2,771,627,129     | 1,488,522                 | 277,162,713                | 3,998                     | 138,189,052 | 64,155              | 13,818,905           |
| 14       | P99                                | May             | August        | 2,757,319,383     | 1,474,502                 | 275,731,938                | 3,978                     | 141,076,679 | 66,671              | 14,107,668           |
| 15       | P99                                | June            | July          | 2,457,557,174     | 1,446,473                 | 245,755,717                | 3,545                     | 202,184,272 | 81,724              | 20,218,427           |
| 16       | P99                                | June            | August        | 2,532,237,024     | 1,462,031                 | 253,223,702                | 3,653                     | 186,814,521 | 79,293              | 18,681,452           |

|             |               |           |             |       |             |         |            |
|-------------|---------------|-----------|-------------|-------|-------------|---------|------------|
| <b>Min</b>  | 2,457,557,174 | 1,446,473 | 245,755,717 | 3,545 | 138,189,052 | 64,155  | 13,818,905 |
| <b>Max</b>  | 3,189,476,033 | 1,712,930 | 318,947,603 | 4,601 | 270,285,179 | 109,250 | 27,028,518 |
| <b>Main</b> | 2,933,796,608 | 1,568,875 | 293,379,661 | 4,232 | 160,717,637 | 75,954  | 16,071,764 |

(\*) Main analysis – all months

**Table S7.** Summary indicators for sensitivity analysis – excluding months with predicted biomass smoke source

| Scenario | PM2.5 threshold for LFS summer day | Start of winter | End of winter | Costs - Woodstove | Costs per day - Woodstove | Costs per year - Woodstove | Costs per woodheater-year | Costs - LFS | Costs per day - LFS | Costs per year - LFS |
|----------|------------------------------------|-----------------|---------------|-------------------|---------------------------|----------------------------|---------------------------|-------------|---------------------|----------------------|
|          |                                    |                 |               | \$AUD             | \$AUD/wHS-day             | \$AUD/year                 | \$AUD/woodheater-year     | \$AUD       | \$AUD/LFS-day       | \$AUD/year           |
| 1        | P75                                | May             | July          | 2,095,087,377     | 2,277,269                 | 209,508,738                | 3,022                     | 117,298,133 | 97,586              | 11,729,813           |
| 2        | P75                                | May             | August        | 2,615,387,526     | 2,126,331                 | 261,538,753                | 3,773                     | 117,298,133 | 97,586              | 11,729,813           |
| 3        | P75                                | June            | July          | 1,451,117,999     | 2,378,882                 | 145,111,800                | 2,093                     | 117,298,133 | 97,586              | 11,729,813           |
| 4        | P75                                | June            | August        | 1,971,418,149     | 2,142,846                 | 197,141,815                | 2,844                     | 117,298,133 | 97,586              | 11,729,813           |
| 5        | P90                                | May             | July          | 2,008,903,175     | 2,183,590                 | 200,890,318                | 2,898                     | 103,746,009 | 86,311              | 10,374,601           |
| 6        | P90                                | May             | August        | 2,501,129,844     | 2,033,439                 | 250,112,984                | 3,608                     | 103,746,009 | 86,311              | 10,374,601           |
| 7        | P90                                | June            | July          | 1,393,520,008     | 2,284,459                 | 139,352,001                | 2,010                     | 103,746,009 | 86,311              | 10,374,601           |
| 8        | P90                                | June            | August        | 1,885,746,677     | 2,049,725                 | 188,574,668                | 2,720                     | 103,746,009 | 86,311              | 10,374,601           |
| 9        | P95                                | May             | July          | 1,961,487,669     | 2,132,052                 | 196,148,767                | 2,830                     | 97,269,098  | 80,923              | 9,726,910            |
| 10 (*)   | P95                                | May             | August        | 2,438,431,608     | 1,982,465                 | 243,843,161                | 3,518                     | 97,269,098  | 80,923              | 9,726,910            |
| 11       | P95                                | June            | July          | 1,361,744,516     | 2,232,368                 | 136,174,452                | 1,965                     | 97,269,098  | 80,923              | 9,726,910            |
| 12       | P95                                | June            | August        | 1,838,688,455     | 1,998,574                 | 183,868,846                | 2,653                     | 97,269,098  | 80,923              | 9,726,910            |
| 13       | P99                                | May             | July          | 1,860,035,105     | 2,021,777                 | 186,003,510                | 2,683                     | 85,999,700  | 71,547              | 8,599,970            |
| 14       | P99                                | May             | August        | 2,305,777,124     | 1,874,616                 | 230,577,712                | 3,326                     | 85,999,700  | 71,547              | 8,599,970            |
| 15       | P99                                | June            | July          | 1,293,866,903     | 2,121,093                 | 129,386,690                | 1,867                     | 85,999,700  | 71,547              | 8,599,970            |
| 16       | P99                                | June            | August        | 1,739,608,922     | 1,890,879                 | 173,960,892                | 2,510                     | 85,999,700  | 71,547              | 8,599,970            |

|             |               |           |             |       |             |        |            |
|-------------|---------------|-----------|-------------|-------|-------------|--------|------------|
| <b>Min</b>  | 1,293,866,903 | 1,874,616 | 129,386,690 | 1,867 | 85,999,700  | 71,547 | 8,599,970  |
| <b>Max</b>  | 2,615,387,526 | 2,378,882 | 261,538,753 | 3,773 | 117,298,133 | 97,586 | 11,729,813 |
| <b>Main</b> | 2,438,431,608 | 1,982,465 | 243,843,161 | 3,518 | 97,269,098  | 80,923 | 9,726,910  |

**(\*) Main analysis – excluding months with predicted biomass smoke source**



## References

1. EPA Tasmania Base Line Air Network of EPA Tasmania (BLANkET) Available online: <https://epa.tas.gov.au/epa/air/monitoring-air-pollution/real-time-air-quality-data-for-tasmania/about-blanket> (accessed on Feb 1, 2020).
2. Department of Primary Industries, Parks, W. and E.-T.G. Fire History Available online: <https://www.thelist.tas.gov.au/app/content/data/geo-meta-data-record?detailRecordUID=b94d4388-995d-416a-9844-a39de2798bed> (accessed on Apr 1, 2019).
3. Reisen, F.; Meyer, C.P.M.; Keywood, M.D. Impact of biomass burning sources on seasonal aerosol air quality. *Atmos. Environ.* **2013**, *67*, 437–447.
4. Johnston, F.H.; Hanigan, I.C.; Henderson, S.B.; Morgan, G.G. Evaluation of interventions to reduce air pollution from biomass smoke on mortality in Launceston, Australia: retrospective analysis of daily mortality, 1994-2007. *BMJ* **2013**, *346*, e8446.
5. Innis, J. *Overview of the BLANkET smoke monitoring network: Development and operation, 2009–2015*; 2015;
6. EPA Tasmania *Spatial distribution of wood heaters and open fires in Tasmania*; 2017;
7. Australian Bureau of Statistics 2016 Census of Population and Housing: Mesh Block Counts, Australia (2074.0) Available online: <https://www.abs.gov.au/ausstats/abs@.nsf/mf/2074.0> (accessed on Jan 15, 2019).
